# Supplementary material
Source: publisher figshare collection journal article supplement (https://asha.figshare.com/articles/dataset/_/25293046)
Supplement: Supplementary file 1 [file 1]

## Supplemental Material S4. Search terms for Concept 1 – dynamic assessment.

| Medline                                                                                   | Embase                                                                            | PsycINFO                                                                      | CINAHL                                                                                                                                                                               | ERIC                                                               |
|-------------------------------------------------------------------------------------------|-----------------------------------------------------------------------------------|-------------------------------------------------------------------------------|--------------------------------------------------------------------------------------------------------------------------------------------------------------------------------------|--------------------------------------------------------------------|
| <b>No subject heading</b>                                                                 | <i>Clinical assessment OR Clinical assessment tool OR Language test</i>           | <i>Measurement</i>                                                            | <i>Speech and Language Assessment</i>                                                                                                                                                | <i>Educational assessment</i>                                      |
| <b>(dynamic OR mediat*) ADJ3 (Assess* OR test* OR screen* OR measur* OR tool*).tw,kf.</b> | dynamic OR mediat*) ADJ3 (Assess* OR test* OR screen* OR measur* OR tool*).tw,kw. | dynamic OR mediat*) ADJ3 (Assess* OR test* OR screen* OR measur* OR tool*).tw | TI (Dynamic N3 (Assess* OR test* OR screen* OR tool* OR task* OR measur* ) ) OR AB (Dynamic N3 (Assess* OR test* OR screen* OR tool* OR task* OR measur* ) )                         | (Dynamic) NEAR/3 (assess* OR test* OR screen* OR measur* OR tool*) |
| <b>OR</b>                                                                                 | OR                                                                                | OR                                                                            |                                                                                                                                                                                      |                                                                    |
| <b>respon* ADJ3 interven*.tw,kf.</b>                                                      | respon* ADJ3 interven*.tw,kw.                                                     | respon* ADJ3 interven*.tw                                                     | OR                                                                                                                                                                                   | OR                                                                 |
| <b>OR</b>                                                                                 | OR                                                                                | OR                                                                            | TI ((Learning potential) N3 (assess* OR screen* OR test* OR tool* OR task* OR measur*)) OR AB ((Learning potential) ADJ3 (assess* OR screen* OR test* OR tool* OR task* OR measur*)) | (Mediat*) NEAR/3 (assess* OR test* or screen* or measur* OR tool*) |
| <b>Modifiability ADJ3 Index.tw,kf.</b>                                                    | Modifiability ADJ3 Index.tw,kw.                                                   | Modifiability ADJ3 Index.tw                                                   |                                                                                                                                                                                      |                                                                    |
| <b>OR</b>                                                                                 | OR                                                                                | OR                                                                            |                                                                                                                                                                                      |                                                                    |
| <b>Learning Potential.tw,kf.</b>                                                          | Learning Potential.tw,kw.                                                         | Learning Potential.tw                                                         |                                                                                                                                                                                      | OR                                                                 |
| <b>OR</b>                                                                                 | OR                                                                                | OR                                                                            | OR                                                                                                                                                                                   | (Respon*) NEAR/3(interven*)                                        |
| <b>(comput* adapt* test*).tw,kf.</b>                                                      | (comput* adapt* test*).tw,kf.                                                     | (comput* adapt* test*).tw                                                     | TI response to intervention OR AB response to intervention                                                                                                                           | OR                                                                 |
|                                                                                           |                                                                                   |                                                                               | OR                                                                                                                                                                                   | (Modifiability) NEAR/3 (Index)                                     |
|                                                                                           |                                                                                   |                                                                               | TI(comput* Adapt* test*) OR AB(comput* adapt* test*)                                                                                                                                 | OR                                                                 |
|                                                                                           |                                                                                   |                                                                               |                                                                                                                                                                                      | Learning potential                                                 |
|                                                                                           |                                                                                   |                                                                               |                                                                                                                                                                                      | OR                                                                 |
|                                                                                           |                                                                                   |                                                                               |                                                                                                                                                                                      | Comput* adapt * test*                                              |
