# Supplementary material
Source: publisher figshare collection journal article supplement (https://asha.figshare.com/articles/dataset/_/25293046)
Supplement: Supplementary file 2 [file 1]

Supplemental Material S5. Search terms for Concept 2 – Literacy.

| Medline                                                                       | Embase                                                                        | PsycINFO                                                                  | CINAHL                                                                 | ERIC                                                                                                     |
|-------------------------------------------------------------------------------|-------------------------------------------------------------------------------|---------------------------------------------------------------------------|------------------------------------------------------------------------|----------------------------------------------------------------------------------------------------------|
| <i>Literacy OR Reading OR Writing</i>                                         | <i>Literacy OR Reading</i>                                                    | <i>Literacy OR Reading OR Writing Skills OR Academic Writing</i>          | <i>Literacy OR Reading</i>                                             | <i>Emergent literacy OR Literacy OR Literacy education OR Literacy skills OR Assessment literacy ...</i> |
| phonem*.tw,kf.                                                                | phonem*.tw,kw.                                                                | phonem*.tw                                                                | TI phonem* OR AB phonem*                                               |                                                                                                          |
| OR                                                                            | OR                                                                            |                                                                           | OR                                                                     |                                                                                                          |
| phonolog*.tw,kf.                                                              | phonolog*.tw,kw.                                                              | OR                                                                        | TI phonolog* OR AB phonolog*                                           | Phonem*                                                                                                  |
| OR                                                                            | OR                                                                            | phonolog*.tw                                                              | OR                                                                     | OR                                                                                                       |
| phonic*.tw,kf.                                                                | phonic*.tw,kw.                                                                | OR                                                                        | TI phonic* OR AB phonic*                                               | Phonolog*                                                                                                |
| OR                                                                            | OR                                                                            | phonic*.tw                                                                | OR                                                                     | OR                                                                                                       |
| (sound* ADJ3 (blend* OR segment* OR manipul* OR substitut* OR delet*)).tw,kf. | (sound* ADJ3 (blend* OR segment* OR manipul* OR substitut* OR delet*)).tw,kw. | OR                                                                        | TI (sound*) N3(blend* OR segment* OR manipul* OR delet* OR substitut*) | Phonic*                                                                                                  |
| OR                                                                            | OR                                                                            | (sound* ADJ3 (blend* OR segment* OR manipul* OR substitut* OR delet*)).tw | OR                                                                     | OR                                                                                                       |
| ((letter* OR alphabet*) ADJ3 knowledge)tw,kf.                                 | ((letter* OR alphabet*) ADJ3 knowledge)tw,kw.                                 | OR                                                                        | AB sound*) N3(blend* OR segment* OR manipul* OR delet* OR substitut*)  | (sound*) NEAR/3 (blend* OR segment* OR manipul* OR substitut* OR delet*)                                 |
| (read OR reading).tw,kf.                                                      | (read OR reading).tw,kw.                                                      | ((letter* OR alphabet*) ADJ3 knowledge)tw                                 | OR                                                                     | OR                                                                                                       |
| OR                                                                            | OR                                                                            | (read OR reading).tw                                                      | TI (letter* OR alphabet*) N3 (knowledge OR principle)                  | (letter*) NEAR/3 (knowledge)                                                                             |
| (write OR writing).tw,kf.                                                     | (write OR writing).tw,kw.                                                     | OR                                                                        | OR                                                                     | OR                                                                                                       |
| OR                                                                            | OR                                                                            | (write OR writing).tw                                                     | AB (letter* OR alphabet*) N3 (knowledge OR principle)                  | (alphabet*) NEAR/3 (knowledge OR principle)                                                              |
| (spell OR spelling).tw,kf.                                                    | (spell OR spelling).tw,kw.                                                    | OR                                                                        | OR                                                                     | OR                                                                                                       |
| OR                                                                            | OR                                                                            | (spell OR spelling).tw                                                    | TI ((read OR reading)) OR AB ((read OR reading))                       | Write                                                                                                    |
| (decode OR decoding).tw,kf.                                                   | (decode OR decoding).tw,kw.                                                   | OR                                                                        | OR                                                                     | OR                                                                                                       |
|                                                                               |                                                                               | (decode OR decoding).tw                                                   | TI ((write OR writing)) OR AB ((write OR writing))                     | Writing                                                                                                  |
|                                                                               |                                                                               |                                                                           | OR                                                                     | OR                                                                                                       |
|                                                                               |                                                                               |                                                                           | OR                                                                     | Spell                                                                                                    |
|                                                                               |                                                                               |                                                                           | OR                                                                     | OR                                                                                                       |
|                                                                               |                                                                               |                                                                           |                                                                        | Spelling                                                                                                 |

|  |                                                           |             |
|--|-----------------------------------------------------------|-------------|
|  | TI ((spell OR spelling)) OR AB<br>((spell OR spelling))   | OR          |
|  |                                                           | Decode      |
|  | OR                                                        |             |
|  |                                                           | OR decoding |
|  | TI ((decode OR decoding)) OR AB<br>((decode OR decoding)) |             |
