# Supplementary material
Source: publisher figshare collection journal article supplement (https://asha.figshare.com/articles/dataset/_/25293046)
Supplement: Supplementary file 3 [file 1]

## Supplemental Material S6. Quality appraisal of included studies.

| Study                      | Participants                                               | Dynamic Assessment                   |                                                                  | Word Reading Outcome Measures                        |                                                    | Flow and Timing                                 |                                                                           | Statistical Analyses                            | Overall Score and /12 (%) | Overall Appraisal |
|----------------------------|------------------------------------------------------------|--------------------------------------|------------------------------------------------------------------|------------------------------------------------------|----------------------------------------------------|-------------------------------------------------|---------------------------------------------------------------------------|-------------------------------------------------|---------------------------|-------------------|
|                            | Were participant characteristics adequately described? (1) | Was the DA adequately described? (2) | Was the test appropriate for evaluating word reading skills? (2) | Was the WR outcome measure adequately described? (2) | Was the WR outcome measure valid and reliable? (2) | Were all participants included in analyses? (1) | Were reasons for exclusion or loss to follow up adequately described? (1) | Were appropriate statistical analyses used? (1) |                           |                   |
| Aravena et al., 2013       | 1                                                          | 2                                    | 2                                                                | 2                                                    | 2                                                  | 0                                               | 1                                                                         | 1                                               | 11(92%)                   | High              |
| Aravena et al., 2018       | 1                                                          | 2                                    | 1                                                                | 2                                                    | 2                                                  | 1                                               | 1                                                                         | 1                                               | 11(92%)                   | High              |
| Barker & Saunders, 2020    | 1                                                          | 1                                    | 2                                                                | 2                                                    | 2                                                  | 0                                               | 1                                                                         | 1                                               | 10(83%)                   | High              |
| Caffrey, 2006              | 0                                                          | 2                                    | 2                                                                | 2                                                    | 2                                                  | 0                                               | 1                                                                         | 1                                               | 10(83%)                   | High              |
| Cho & Compton, 2015        | 1                                                          | 2                                    | 2                                                                | 2                                                    | 2                                                  | 1                                               | 1                                                                         | 1                                               | 12(100%)                  | High              |
| Cho et al., 2014           | 0                                                          | 2                                    | 2                                                                | 2                                                    | 2                                                  | 0                                               | 1                                                                         | 1                                               | 10(83%)                   | High              |
| Cho et al., 2017           | 1                                                          | 2                                    | 2                                                                | 2                                                    | 2                                                  | 0                                               | 1                                                                         | 1                                               | 11(92%)                   | High              |
| Chow, 2014                 | 1                                                          | 2                                    | 2                                                                | 2                                                    | 2                                                  | 2                                               | 1                                                                         | 1                                               | 12(100%)                  | High              |
| Clayton et al., 2018       | 1                                                          | 2                                    | 2                                                                | 1                                                    | 2                                                  | 0                                               | 1                                                                         | 1                                               | 10(83%)                   | High              |
| Compton et al., 2010       | 0                                                          | 2                                    | 2                                                                | 2                                                    | 2                                                  | 0                                               | 1                                                                         | 1                                               | 10(83%)                   | High              |
| Coventry et al., 2011      | 1                                                          | 2                                    | 2                                                                | 2                                                    | 2                                                  | 0                                               | 0                                                                         | 1                                               | 10(83%)                   | High              |
| Cunningham & Carroll, 2011 | 0                                                          | 2                                    | 2                                                                | 2                                                    | 2                                                  | 1                                               | 1                                                                         | 1                                               | 11(92%)                   | High              |
| Edwards, 2020              | 0                                                          | 0                                    | 2                                                                | 2                                                    | 2                                                  | 1                                               | 1                                                                         | 1                                               | 9(75%)                    | High              |
| Fuchs et al., 2011         | 0                                                          | 2                                    | 2                                                                | 2                                                    | 2                                                  | 0                                               | 1                                                                         | 1                                               | 10(83%)                   | High              |
| Gan et al., 2022           | 0                                                          | 1                                    | 2                                                                | 2                                                    | 2                                                  | 1                                               | 1                                                                         | 1                                               | 11(92%)                   | High              |
| Gellert & Elbro, 2017a     | 0                                                          | 2                                    | 2                                                                | 2                                                    | 2                                                  | 0                                               | 1                                                                         | 1                                               | 10(83%)                   | High              |
| Gellert & Elbro 2017b      | 1                                                          | 2                                    | 2                                                                | 2                                                    | 2                                                  | 0                                               | 1                                                                         | 1                                               | 11(92%)                   | High              |
| Gellert & Elbro, 2018      | 0                                                          | 2                                    | 2                                                                | 2                                                    | 2                                                  | 0                                               | 1                                                                         | 1                                               | 10(83%)                   | High              |
| Gillam et al., 2011        | 0                                                          | 2                                    | 2                                                                | 2                                                    | 2                                                  | 1                                               | 1                                                                         | 1                                               | 11(92%)                   | High              |

|                         |   |   |   |   |   |   |   |   |          |      |
|-------------------------|---|---|---|---|---|---|---|---|----------|------|
| Horbach et al., 2015    | 1 | 2 | 2 | 2 | 2 | 0 | 0 | 1 | 10(83%)  | High |
| Horbach et al., 2018    | 1 | 2 | 2 | 2 | 2 | 0 | 1 | 0 | 10(83%)  | High |
| Law et al., 2018        | 0 | 2 | 2 | 2 | 2 | 1 | 1 | 1 | 11(92%)  | High |
| Liu & Chung, 2021       | 1 | 1 | 2 | 2 | 0 | 1 | 1 | 1 | 9(75%)   | High |
| Loreti, 2015            | 1 | 0 | 1 | 2 | 2 | 1 | 1 | 1 | 9(75%)   | High |
| Osa Fuentes, 2003       | 0 | 2 | 2 | 2 | 0 | 1 | 1 | 1 | 9(75%)   | High |
| Petersen & Gillam, 2015 | 1 | 2 | 2 | 2 | 2 | 1 | 1 | 1 | 12(100%) | High |
| Petersen et al., 2016   | 0 | 2 | 2 | 2 | 2 | 1 | 1 | 1 | 11(92%)  | High |
| Petersen et al., 2018   | 0 | 2 | 2 | 2 | 2 | 0 | 1 | 1 | 10(83%)  | High |
| Sittner Bridges, 2009   | 0 | 2 | 2 | 2 | 2 | 1 | 1 | 1 | 11 (92%) | High |
| Spector, 1992           | 0 | 2 | 2 | 2 | 2 | 0 | 1 | 1 | 10(83%)  | High |
| Wyman Chin, 2018        | 0 | 1 | 1 | 2 | 2 | 1 | 1 | 1 | 9(75%)   | High |
| Yap, 2018               | 1 | 2 | 2 | 2 | 2 | 0 | 1 | 1 | 11(92%)  | High |
| Zumeta, 2010            | 1 | 2 | 2 | 2 | 2 | 1 | 1 | 1 | 12(100%) | High |

*Note.* DA = dynamic assessment; WR = word reading; low = 0-33%; medium = 34-66%; high = 67-100%.

## References

- Aravena, S., Snellings, P., Tijms, J., & van der Molen, M. W. (2013). A lab-controlled simulation of a letter–speech sound binding deficit in dyslexia. *Journal of Experimental Child Psychology*, 115(4), 691–707. <https://doi.org/10.1016/j.jecp.2013.03.009>
- Aravena, S., Tijms, J., Snellings, P., & van der Molen, M. W. (2018). Predicting individual differences in reading and spelling skill with artificial script–based letter–speech sound training. *Journal of Learning Disabilities*, 51(6), 552–564. <https://doi.org/10.1177/0022219417715407>
- Barker, R. M., & Saunders, K. J. (2020). Validity of a nonspeech dynamic assessment of the alphabetic principle in preschool and school-aged children. *Augmentative and Alternative Communication*, 36(1), 54–62. <https://doi.org/10.1080/07434618.2020.1737965>
- Caffrey, E. (2006). *A comparison of dynamic assessment and progress monitoring in the prediction of reading achievement for students in kindergarten and first grade* [Doctoral dissertation]. Vanderbilt University.
- Cho, E., & Compton, D. L. (2015). Construct and incremental validity of dynamic assessment of decoding within and across domains. *Learning and Individual Differences*, 37, 183–196. <https://doi.org/10.1016/j.lindif.2014.10.004>
- Cho, E., Compton, D. L., Fuchs, D., Fuchs, L. S., & Bouton, B. (2014). Examining the predictive validity of a dynamic assessment of decoding to forecast response to tier 2 intervention. *Journal of Learning Disabilities*, 47(5), 409–423. <https://doi.org/10.1177/0022219412466703>
- Cho, E., Compton, D. L., Gilbert, J. K., Steacy, L. M., Collins, A. A., & Lindström, E. R. (2017). Development of first-graders' word reading skills: For whom can dynamic assessment tell us more? *Journal of Learning Disabilities*, 50(1), 95–112. <https://doi.org/10.1177/0022219415599343>
- Chow, B. W. Y. (2014). The differential roles of paired associate learning in Chinese and English word reading abilities in bilingual children. *Reading and Writing*, 27(9), 1657–1672. <https://doi.org/10.1007/s11145-014-9514-3>
- Clayton, F. J., Sears, C., Davis, A., & Hulme, C. (2018). Verbal task demands are key in explaining the relationship between paired-associate learning and reading ability. *Journal of Experimental Child Psychology*, 171, 46–54. <https://doi.org/10.1016/j.jecp.2018.01.004>
- Compton, D. L., Fuchs, D., Fuchs, L. S., Bouton, B., Gilbert, J. K., Barquero, L. A., Cho, E., & Crouch, R. C. (2010). Selecting at-risk first-grade readers for early intervention: Eliminating false positives and exploring the promise of a two-stage gated screening process. *Journal of Educational Psychology*, 102(2), 327–340. <https://doi.org/10.1037/a0018448>

- Coventry, W. L., Byrne, B., Olson, R. K., Corley, R., & Samuelsson, S. (2011). Dynamic and static assessment of phonological awareness in preschool: A behavior-genetic study. *Journal of Learning Disabilities*, 44(4), 322–329. <https://doi.org/10.1177/0022219411407862>
- Cunningham, A., & Carroll, J. (2011). Age and schooling effects on early literacy and phoneme awareness. *Journal of Experimental Child Psychology*, 109(2), 248–255. <https://doi.org/10.1016/j.jecp.2010.12.005>
- Edwards, A. (2020). *Predictor importance in future and concurrent predictions of oral reading fluency* [Course report, Florida State University].
- Fuchs, D., Compton, D. L., Fuchs, L. S., Bouton, B., & Caffrey, E. (2011). The construct and predictive validity of a dynamic assessment of young children learning to read: Implications for RTI frameworks. *Journal of Learning Disabilities*, 44(4), 339–347. <https://doi.org/10.1177/0022219411407864>
- Gan, Y., Zhang, J., Kahrabi-Yamato, L., Su, Y., Zhang, J., Jiang, Y., Hui, Y., & Li, H. (2022). The unique predictive value of dynamic assessment of character decoding in reading development of Chinese children from Grades 1 to 2. *Scientific Studies of Reading*, 27(3), 215–231. <https://doi.org/10.1080/10888438.2022.2143271>
- Gellert, A. S., & Elbro, C. (2017a). Does a dynamic test of phonological awareness predict early reading difficulties? A longitudinal study from kindergarten through Grade 1. *Journal of Learning Disabilities*, 50(3), 227–237. <https://doi.org/10.1177/0022219415609185>
- Gellert, A. S., & Elbro, C. (2017b). Try a little bit of teaching: A dynamic assessment of word decoding as a kindergarten predictor of word reading difficulties at the end of Grade 1. *Scientific Studies of Reading*, 21(4), 277–291. <https://doi.org/10.1080/10888438.2017.1287187>
- Gellert, A. S., & Elbro, C. (2018). Predicting reading disabilities using dynamic assessment of decoding before and after the onset of reading instruction: A longitudinal study from kindergarten through Grade 2. *Annals of Dyslexia*, 68(2), 126–144. <https://doi.org/10.1007/s11881-018-0159-9>
- Gillam, S. L., Fargo, J., Foley, B., & Olszewski, A. (2011). A nonverbal phoneme deletion task administered in a dynamic assessment format. *Journal of Communication Disorders*, 44(2), 236–245. <https://doi.org/10.1016/j.jcomdis.2010.11.003>
- Horbach, J., Scharke, W., Cröll, J., Heim, S., & Günther, T. (2015). Kindergarteners' performance in a sound–symbol paradigm predicts early reading. *Journal of Experimental Child Psychology*, 139, 256–264. <https://doi.org/10.1016/j.jecp.2015.06.007>
- Horbach, J., Weber, K., Opolony, F., Scharke, W., Radach, R., Heim, S., & Günther, T. (2018). Performance in sound–symbol learning predicts reading performance 3 years later. *Frontiers in Psychology*, 9, Article 1716. <https://doi.org/10.3389/fpsyg.2018.01716>
- Law, J. M., De Vos, A., Vanderauwera, J., Wouters, J., Ghesquière, P., & Vandermosten, M. (2018). Grapheme–phoneme learning in an unknown orthography: A study in typical reading and dyslexic children. *Frontiers in Psychology*, 9, Article 1393. <https://doi.org/10.3389/fpsyg.2018.01393>
- Liu, C., Chung, K. K. H., Wang, L. C., & Liu, D. (2021). The relationship between paired associate learning and Chinese word reading in kindergarten children. *Journal of Research in Reading*, 44(2), 264–283. <https://doi.org/10.1111/1467-9817.12333>
- Loreti, B. (2015). *Validity of a Spanish nonspeech dynamic assessment of phonological awareness in children from Spanish-speaking backgrounds* [Master's dissertation]. University of South Florida. <https://digitalcommons.usf.edu/etd/5732>
- Osa Fuentes, P. M. D. L. (2003). *Evaluación dinámica del procesamiento fonológico en el inicio lector* [Dynamic evaluation of phonological processing in beginning readers] [Doctoral dissertation]. Universidad de Granada. <https://hdl.handle.net/10481/4425>
- Petersen, D. B., Allen, M. M., & Spencer, T. D. (2016). Predicting reading difficulty in first grade using dynamic assessment of decoding in early kindergarten: A large-scale longitudinal study. *Journal of Learning Disabilities*, 49(2), 200–215. <https://doi.org/10.1177/0022219414538518>
- Petersen, D. B., & Gillam, R. B. (2015). Predicting reading ability for bilingual Latino children using dynamic assessment. *Journal of Learning Disabilities*, 48(1), 3–21. <https://doi.org/10.1177/0022219413486930>
- Petersen, D. B., Gragg, S. L., & Spencer, T. D. (2018). Predicting reading problems 6 years into the future: Dynamic assessment reduces bias and increases classification accuracy. *Language, Speech, and Hearing Services in Schools*, 49(4), 875–888. [https://doi.org/10.1044/2018\\_LSHSS-DYSLC-18-0021](https://doi.org/10.1044/2018_LSHSS-DYSLC-18-0021)
- Sittner Bridges, M. (2009). *The use of a dynamic screening of phonological awareness to predict reading risk for kindergarten students* [Doctoral dissertation]. University of Kansas. <https://kuscholarworks.ku.edu/handle/1808/6631?show=full>
- Spector, J. E. (1992). Predicting progress in beginning reading: Dynamic assessment of phonemic awareness. *Journal of Educational Psychology*, 84(3), 353–363. <https://doi.org/10.1037/0022-0663.84.3.353>
- Wyman Chin, K. R. (2018). *Validity of a dynamic assessment of phonological awareness in emergent bilingual children* [Master's dissertation]. University of South Florida. <https://digitalcommons.usf.edu/etd/7384>
- Yap, D. F. F. (2018). *The utility of dynamic assessment of phonological awareness for bilingual children in Singapore* [Doctoral dissertation]. San Francisco State University & University of California, Berkeley. <https://escholarship.org/uc/item/1kg9j39s>
- Zumeta, R. O. R. (2010). *Enhancing the accuracy of kindergarten screening* [Doctoral dissertation]. Vanderbilt University. <https://etd.library.vanderbilt.edu/etd-08192010-224436>
