# Supplementary material
Source: publisher figshare collection journal article supplement (https://asha.figshare.com/articles/dataset/_/25293046)
Supplement: Supplementary file 4 [file 1]

**Supplemental Material S7.** Effect sizes (Pearson's correlation coefficients) representing relationship between dynamic assessments of word reading skills and word reading outcome measures.

| Study                   | <i>N</i> | <i>r</i> | Design | Dynamic Assessment Skill | Word Reading Measure Skill | Word Reading Measure Type | Word Reading Measure Name |
|-------------------------|----------|----------|--------|--------------------------|----------------------------|---------------------------|---------------------------|
| Aravena et al., 2013    | 42       | 0.52     | C      | Dec                      | Real Word Rate             | NR                        | One Minute Test           |
| Aravena et al., 2018    | 71       | 0.015    | C      | SSK                      | Real Word Accuracy         | NR                        | 3DM                       |
| Aravena et al., 2018    | 71       | 0.075    | C      | SSK                      | Real Word Rate             | NR                        | 3DM                       |
| Aravena et al., 2018    | 71       | 0.237    | C      | SSK                      | Real Word Accuracy         | NR                        | 3DM                       |
| Aravena et al., 2018    | 71       | 0.147    | C      | SSK                      | Real Word Rate             | NR                        | 3DM                       |
| Aravena et al., 2018    | 71       | 0.214    | C      | Dec                      | Real Word Accuracy         | NR                        | 3DM                       |
| Aravena et al., 2018    | 71       | 0.392    | C      | Dec                      | Real Word Rate             | NR                        | 3DM                       |
| Barker & Saunders, 2020 | 27       | 0.47     | C      | SSK                      | Nonword Accuracy           | NR                        | WRMT-III                  |
| Barker & Saunders, 2020 | 27       | 0.63     | C      | SSK                      | Real Word Accuracy         | NR                        | WRMT-III                  |
| Caffrey, 2006, Study 1  | 25       | 0.706    | L      | Dec                      | Real Word Accuracy         | NR                        | WRAT                      |
| Caffrey, 2006, Study 1  | 25       | 0.585    | L      | Dec                      | Nonword Accuracy           | NR                        | WRAT                      |
| Caffrey, 2006, Study 1  | 25       | 0.624    | L      | Dec                      | Nonword Rate               | NR                        | WRAT                      |
| Caffrey, 2006, Study 2  | 95       | 0.765    | L      | Dec                      | Real Word Accuracy         | NR                        | WRAT                      |
| Caffrey, 2006, Study 2  | 95       | 0.613    | L      | Dec                      | Nonword Accuracy           | NR                        | WRAT                      |
| Caffrey, 2006, Study 2  | 95       | 0.745    | L      | Dec                      | Nonword Rate               | NR                        | WRAT                      |
| Cho & Compton, 2015     | 112      | 0.24     | C      | SSK                      | Nonword Accuracy           | NR                        | WRMT-R/NU                 |
| Cho & Compton, 2015     | 112      | 0.5      | C      | SSK                      | Nonword Rate               | NR                        | TOWRE                     |
| Cho & Compton, 2015     | 112      | 0.64     | C      | SSK                      | Real Word Accuracy         | NR                        | WRMT-R/NU                 |
| Cho & Compton, 2015     | 112      | 0.24     | C      | SSK                      | Real Word Rate             | NR                        | TOWRE                     |
| Cho & Compton, 2015     | 112      | 0.4      | C      | Dec                      | Nonword Accuracy           | NR                        | WRMT-R/NU                 |
| Cho & Compton, 2015     | 112      | 0.51     | C      | Dec                      | Nonword Rate               | NR                        | TOWRE                     |
| Cho & Compton, 2015     | 112      | 0.23     | C      | Dec                      | Real Word Accuracy         | NR                        | WRMT-R/NU                 |
| Cho & Compton, 2015     | 112      | 0.43     | C      | Dec                      | Real Word Rate             | NR                        | TOWRE                     |
| Cho & Compton, 2015     | 112      | 0.54     | C      | Dec                      | Nonword Accuracy           | NR                        | WRMT-R/NU                 |
| Cho & Compton, 2015     | 112      | 0.14     | C      | Dec                      | Nonword Rate               | NR                        | TOWRE                     |
| Cho & Compton, 2015     | 112      | 0.32     | C      | Dec                      | Real Word Accuracy         | NR                        | WRMT-R/NU                 |
| Cho & Compton, 2015     | 112      | 0.41     | C      | Dec                      | Real Word Rate             | NR                        | TOWRE                     |
| Cho et al., 2014        | 134      | 0.69     | C      | Dec                      | Nonword Accuracy           | NR                        | WRMT-R/NU                 |
| Cho et al., 2014        | 134      | 0.58     | C      | Dec                      | Nonword Rate               | NR                        | TOWRE                     |
| Cho et al., 2017        | 105      | 0.22     | C      | SSK                      | Real Word Accuracy         | NR                        | WRMT-R/NU                 |
| Cho et al., 2017        | 105      | 0.43     | C      | SSK                      | Real Word Rate             | NR                        | TOWRE                     |
| Cho et al., 2017        | 105      | 0.55     | C      | SSK                      | Nonword Accuracy           | NR                        | WRMT-R/NU                 |
| Cho et al., 2017        | 105      | 0.22     | C      | SSK                      | Nonword Rate               | NR                        | TOWRE                     |
| Cho et al., 2017        | 105      | 0.42     | C      | Dec                      | Real Word Accuracy         | NR                        | WRMT-R/NU                 |
| Cho et al., 2017        | 105      | 0.47     | C      | Dec                      | Real Word Rate             | NR                        | TOWRE                     |
| Cho et al., 2017        | 105      | 0.24     | C      | Dec                      | Nonword Accuracy           | NR                        | WRMT-R/NU                 |
| Cho et al., 2017        | 105      | 0.31     | C      | Dec                      | Nonword Rate               | NR                        | TOWRE                     |

|                            |      |       |   |     |                                                                                                     |    |                  |
|----------------------------|------|-------|---|-----|-----------------------------------------------------------------------------------------------------|----|------------------|
| Cho et al., 2017           | 105  | 0.38  | C | Dec | Real Word Accuracy                                                                                  | NR | WRMT-R/NU        |
| Cho et al., 2017           | 105  | 0.19  | C | Dec | Real Word Rate                                                                                      | NR | TOWRE            |
| Cho et al., 2017           | 105  | 0.39  | C | Dec | Nonword Accuracy                                                                                    | NR | WRMT-R/NU        |
| Cho et al., 2017           | 105  | 0.43  | C | Dec | Nonword Rate                                                                                        | NR | TOWRE            |
| Cho et al., 2017           | 105  | 0.21  | L | SSK | Real Word Accuracy                                                                                  | NR | WRMT-R/NU        |
| Cho et al., 2017           | 105  | 0.24  | L | SSK | Real Word Rate                                                                                      | NR | TOWRE            |
| Cho et al., 2017           | 105  | 0.43  | L | SSK | Nonword Accuracy                                                                                    | NR | WRMT-R/NU        |
| Cho et al., 2017           | 105  | 0.22  | L | SSK | Nonword Rate                                                                                        | NR | TOWRE            |
| Cho et al., 2017           | 105  | 0.45  | L | Dec | Real Word Accuracy                                                                                  | NR | WRMT-R/NU        |
| Cho et al., 2017           | 105  | 0.46  | L | Dec | Real Word Rate                                                                                      | NR | TOWRE            |
| Cho et al., 2017           | 105  | 0.1   | L | Dec | Nonword Accuracy                                                                                    | NR | WRMT-R/NU        |
| Cho et al., 2017           | 105  | 0.24  | L | Dec | Nonword Rate                                                                                        | NR | TOWRE            |
| Cho et al., 2017           | 105  | 0.27  | L | Dec | Real Word Accuracy                                                                                  | NR | WRMT-R/NU        |
| Cho et al., 2017           | 105  | 0.11  | L | Dec | Real Word Rate                                                                                      | NR | TOWRE            |
| Cho et al., 2017           | 105  | 0.34  | L | Dec | Nonword Accuracy                                                                                    | NR | WRMT-R/NU        |
| Cho et al., 2017           | 105  | 0.32  | L | Dec | Nonword Rate                                                                                        | NR | TOWRE            |
| Chow, 2014                 | 121  | 0.22  | C | SSK | Real Word Accuracy                                                                                  | NR | HKT-SpLD         |
| Chow, 2014                 | 121  | 0.28  | C | SSK | Real Word Accuracy                                                                                  | RD | NA               |
| Clayton et al., 2018       | 97   | 0.05  | C | SSK | Real Word Accuracy                                                                                  | NR | SWRT6-16         |
| Clayton et al., 2018       | 97   | 0.22  | C | SSK | Real Word Rate                                                                                      | NR | TOWRE            |
| Clayton et al., 2018       | 97   | 0.12  | C | SSK | Nonword Rate                                                                                        | NR | TOWRE            |
| Clayton et al., 2018       | 97   | 0.29  | C | SSK | Real Word Accuracy                                                                                  | NR | SWRT             |
| Clayton et al., 2018       | 97   | 0.1   | C | SSK | Real Word Rate                                                                                      | NR | TOWRE            |
| Clayton et al., 2018       | 97   | 0.26  | C | SSK | Nonword Rate                                                                                        | NR | TOWRE            |
| Compton et al., 2010       | 355  | 0.69  | L | Dec | Composite-Real Word Accuracy, Real Word Rate, Nonword Accuracy, Nonword Rate, Reading Comprehension | NR | TOWRE, WMRT-R/NU |
| Coventry et al., 2011      | 1988 | 0.423 | C | PA  | Real Word Accuracy, Real Word Rate                                                                  | NR | TOWRE            |
| Cunningham & Carroll, 2011 | 45   | 0.67  | C | PA  | Real Word Accuracy                                                                                  | NR | BAS-2            |
| Cunningham & Carroll, 2011 | 45   | 0.77  | L | PA  | Real Word Accuracy                                                                                  | NR | BAS-2            |
| Edwards, 2020              | 312  | 0.5   | C | Dec | Real Word Rate                                                                                      | NR | TOWRE            |
| Edwards, 2020              | 312  | 0.64  | C | Dec | Nonword Rate                                                                                        | NR | TOWRE            |
| Edwards, 2020              | 312  | 0.46  | C | Dec | Real Word Accuracy                                                                                  | NR | WJ-III           |
| Edwards, 2020              | 312  | 0.6   | C | Dec | Nonword Accuracy                                                                                    | NR | WJ-III           |
| Edwards, 2020              | 312  | 0.53  | C | Dec | Real Word Rate                                                                                      | NR | TOWRE            |
| Edwards, 2020              | 312  | 0.61  | C | Dec | Nonword Rate                                                                                        | NR | TOWRE            |
| Edwards, 2020              | 312  | 0.47  | C | Dec | Real Word Accuracy                                                                                  | NR | WJ-III           |
| Edwards, 2020              | 312  | 0.55  | C | Dec | Nonword Accuracy                                                                                    | NR | WJ-III           |
| Fuchs et al., 2011         | 318  | 0.72  | L | Dec | Real Word Accuracy                                                                                  | NR | WRMT-R/NU        |
| Fuchs et al., 2011         | 318  | 0.61  | L | Dec | Real Word Rate                                                                                      | NR | TOWRE            |

|                                   |     |       |   |     |                                                                         |    |                            |
|-----------------------------------|-----|-------|---|-----|-------------------------------------------------------------------------|----|----------------------------|
| <b>Gan et al., 2022</b>           | 135 | 0.68  | C | Dec | Real Word Accuracy                                                      | RD | Character Recognition Task |
| <b>Gan et al., 2022</b>           | 135 | 0.7   | L | Dec | Real Word Accuracy                                                      | RD | Character Recognition Task |
| <b>Gan et al., 2022</b>           | 135 | 0.66  | L | Dec | Real Word Accuracy                                                      | RD | Character Recognition Task |
| <b>Gan et al., 2022</b>           | 135 | 0.64  | L | Dec | Real Word Accuracy                                                      | RD | Character Recognition Task |
| <b>Gellert &amp; Elbro, 2017a</b> | 171 | 0.09  | C | SSK | Real Word Accuracy                                                      | RD | NA                         |
| <b>Gellert &amp; Elbro, 2017a</b> | 171 | 0.65  | C | Dec | Real Word Accuracy                                                      | RD | NA                         |
| <b>Gellert &amp; Elbro, 2017a</b> | 171 | 0.21  | L | SSK | Real Word Accuracy, Nonword Accuracy                                    | RD | NA                         |
| <b>Gellert &amp; Elbro, 2017a</b> | 171 | 0.66  | L | Dec | Real Word Accuracy, Nonword Accuracy                                    | RD | NA                         |
| <b>Gellert &amp; Elbro, 2017b</b> | 160 | 0.46  | L | PA  | Real Word Accuracy                                                      | RD | NA                         |
| <b>Gellert &amp; Elbro, 2017b</b> | 160 | 0.47  | L | PA  | Real Word Accuracy, Nonword Accuracy                                    | RD | NA                         |
| <b>Gellert &amp; Elbro, 2017b</b> | 160 | 0.36  | L | PA  | Real Word Accuracy, Nonword Accuracy                                    | RD | NA                         |
| <b>Gellert &amp; Elbro, 2017b</b> | 160 | 0.65  | L | Dec | Real Word Accuracy, Nonword Accuracy                                    | RD | NA                         |
| <b>Gellert &amp; Elbro, 2017b</b> | 160 | 0.76  | L | Dec | Real Word Accuracy, Nonword Accuracy                                    | RD | NA                         |
| <b>Gellert &amp; Elbro, 2017b</b> | 160 | 0.63  | L | Dec | Real Word Accuracy, Nonword Accuracy                                    | RD | NA                         |
| <b>Gellert &amp; Elbro, 2018</b>  | 158 | 0.2   | C | SSK | Real Word Accuracy                                                      | RD | NA                         |
| <b>Gellert &amp; Elbro, 2018</b>  | 158 | 0.47  | C | SSK | Real Word Accuracy                                                      | RD | NA                         |
| <b>Gellert &amp; Elbro, 2018</b>  | 158 | 0.76  | C | Dec | Real Word Accuracy                                                      | RD | NA                         |
| <b>Gellert &amp; Elbro, 2018</b>  | 158 | 0.84  | C | Dec | Real Word Accuracy, Nonword Accuracy                                    | RD | NA                         |
| <b>Gellert &amp; Elbro, 2018</b>  | 158 | 0.25  | L | SSK | Real Word Accuracy, Nonword Accuracy                                    | RD | NA                         |
| <b>Gellert &amp; Elbro, 2018</b>  | 158 | 0.25  | L | SSK | Real Word Accuracy, Nonword Accuracy                                    | RD | NA                         |
| <b>Gellert &amp; Elbro, 2018</b>  | 158 | 0.42  | L | SSK | Real Word Rate, Nonword Rate                                            | RD | NA                         |
| <b>Gellert &amp; Elbro, 2018</b>  | 158 | 0.35  | L | SSK | Real Word Accuracy, Nonword Accuracy                                    | RD | NA                         |
| <b>Gellert &amp; Elbro, 2018</b>  | 158 | 0.8   | L | SSK | Real Word Accuracy, Nonword Accuracy                                    | RD | NA                         |
| <b>Gellert &amp; Elbro, 2018</b>  | 158 | 0.65  | L | Dec | Real Word Accuracy, Nonword Accuracy                                    | RD | NA                         |
| <b>Gellert &amp; Elbro, 2018</b>  | 158 | 0.69  | L | Dec | Real Word Accuracy, Nonword Accuracy                                    | RD | NA                         |
| <b>Gellert &amp; Elbro, 2018</b>  | 158 | 0.19  | L | Dec | Real Word Rate, Nonword Rate                                            | RD | NA                         |
| <b>Gellert &amp; Elbro, 2018</b>  | 158 | 0.56  | L | Dec | Real Word Accuracy, Nonword Accuracy                                    | RD | NA                         |
| <b>Gellert &amp; Elbro, 2018</b>  | 158 | 0.61  | L | Dec | Real Word Rate, Nonword Rate                                            | RD | NA                         |
| <b>Gillam et al., 2011</b>        | 64  | 0.54  | C | PA  | Nonword Accuracy                                                        | NR | WRMT-R/NU                  |
| <b>Horbach et al., 2015</b>       | 193 | 0.283 | L | SSK | Composite-Real Word Accuracy, Real Word Rate, Nonword Accuracy, Nonword | NR | SLRT-II                    |

|                                    |     |       |   |     | Rate, Reading<br>Comprehension                                                                                     |    |         |
|------------------------------------|-----|-------|---|-----|--------------------------------------------------------------------------------------------------------------------|----|---------|
| <b>Horbach et al., 2015</b>        | 193 | 0.384 | L | Dec | Composite-Real Word<br>Accuracy, Real Word<br>Rate, Nonword<br>Accuracy, Nonword<br>Rate, Reading<br>Comprehension | NR | SLRT-II |
| <b>Horbach et al., 2015</b>        | 193 | 0.212 | L | Dec | Composite-Real Word<br>Accuracy, Real Word<br>Rate, Nonword<br>Accuracy, Nonword<br>Rate, Reading<br>Comprehension | NR | SLRT-II |
| <b>Horbach et al., 2015</b>        | 75  | 0.169 | C | SSK | Nonword Accuracy                                                                                                   | RD | NA      |
| <b>Horbach et al., 2015</b>        | 75  | 0.279 | C | Dec | Nonword Accuracy                                                                                                   | RD | NA      |
| <b>Horbach et al., 2015</b>        | 75  | 0.362 | C | Dec | Nonword Accuracy                                                                                                   | RD | NA      |
| <b>Horbach et al., 2015</b>        | 75  | 0.215 | L | SSK | Composite-Real Word<br>Accuracy, Real Word<br>Rate, Nonword<br>Accuracy, Nonword<br>Rate, Reading<br>Comprehension | NR | SLRT-II |
| <b>Horbach et al., 2015</b>        | 75  | 0.372 | L | Dec | Composite-Real Word<br>Accuracy, Real Word<br>Rate, Nonword<br>Accuracy, Nonword<br>Rate, Reading<br>Comprehension | NR | SLRT-II |
| <b>Horbach et al., 2015</b>        | 75  | 0.258 | L | Dec | Composite-Real Word<br>Accuracy, Real Word<br>Rate, Nonword<br>Accuracy, Nonword<br>Rate, Reading<br>Comprehension | NR | SLRT-II |
| <b>Horbach et al., 2018</b>        | 17  | 0.807 | L | Dec | Real Word Rate                                                                                                     | NR | SLRT-II |
| <b>Horbach et al., 2018</b>        | 17  | 0.855 | L | SSK | Nonword Rate                                                                                                       | NR | SLRT-II |
| <b>Law et al., 2018</b>            | 84  | 0.044 | C | SSK | Real Word Accuracy                                                                                                 | NR | EMT     |
| <b>Law et al., 2018</b>            | 84  | 0.022 | C | SSK | Nonword Accuracy                                                                                                   | NR | Klepel  |
| <b>Law et al., 2018</b>            | 84  | 0.279 | C | Dec | Real Word Accuracy                                                                                                 | NR | EMT     |
| <b>Law et al., 2018</b>            | 84  | 0.086 | C | SSK | Nonword Accuracy                                                                                                   | NR | Klepel  |
| <b>Law et al., 2018</b>            | 84  | 0.027 | C | SSK | Real Word Accuracy                                                                                                 | NR | EMT     |
| <b>Law et al., 2018</b>            | 84  | 0.315 | C | Dec | Nonword Accuracy                                                                                                   | NR | Klepel  |
| <b>Liu &amp; Chung, 2021</b>       | 203 | 0.19  | C | SSK | Real Word Accuracy                                                                                                 | RD | NA      |
| <b>Liu &amp; Chung, 2021</b>       | 203 | 0.18  | C | SSK | Real Word Accuracy                                                                                                 | RD | NA      |
| <b>Loreti, 2015</b>                | 10  | 0.75  | C | PA  | Real Word Accuracy                                                                                                 | NR | WMLSR   |
| <b>Osa Fuentes, 2003</b>           | 164 | 0.44  | L | PA  | Real Word Accuracy                                                                                                 | NR | K-ABC   |
| <b>Osa Fuentes, 2003</b>           | 164 | 0.44  | L | PA  | Real Word Rate                                                                                                     | NR | TALE    |
| <b>Osa Fuentes, 2003</b>           | 164 | 0.64  | L | PA  | Real Word Accuracy                                                                                                 | NR | K-ABC   |
| <b>Osa Fuentes, 2003</b>           | 164 | 0.28  | L | PA  | Real Word Rate                                                                                                     | NR | TALE    |
| <b>Osa Fuentes, 2003</b>           | 164 | 0.33  | L | PA  | Real Word Accuracy                                                                                                 | NR | K-ABC   |
| <b>Osa Fuentes, 2003</b>           | 164 | 0.36  | L | PA  | Real Word Rate                                                                                                     | NR | TALE    |
| <b>Petersen &amp; Gillam, 2015</b> | 63  | 0.24  | L | Dec | Nonword Rate                                                                                                       | CR | DIBELS  |

|                                    |     |      |   |     |                    |    |        |
|------------------------------------|-----|------|---|-----|--------------------|----|--------|
| <b>Petersen &amp; Gillam, 2015</b> | 63  | 0.33 | L | Dec | Real Word Accuracy | NR | WRMT-R |
| <b>Petersen &amp; Gillam, 2015</b> | 63  | 0.46 | L | Dec | Nonword Rate       | CR | DIBELS |
| <b>Petersen &amp; Gillam, 2015</b> | 63  | 0.28 | L | Dec | Real Word Accuracy | NR | WRMT-R |
| <b>Petersen &amp; Gillam, 2015</b> | 63  | 0.39 | L | Dec | Nonword Rate       | CR | DIBELS |
| <b>Petersen &amp; Gillam, 2015</b> | 63  | 0.51 | L | Dec | Real Word Accuracy | NR | WRMT-R |
| <b>Petersen et al., 2016</b>       | 320 | 0.26 | L | Dec | Real Word Rate     | NR | TOWRE  |
| <b>Petersen et al., 2016</b>       | 320 | 0.26 | L | Dec | Nonword Rate       | NR | TOWRE  |
| <b>Petersen et al., 2016</b>       | 320 | 0.34 | L | Dec | Nonword Rate       | CR | DIBELS |
| <b>Petersen et al., 2016</b>       | 320 | 0.37 | L | Dec | Real Word Rate     | NR | TOWRE  |
| <b>Petersen et al., 2016</b>       | 320 | 0.4  | L | Dec | Nonword Rate       | NR | TOWRE  |
| <b>Petersen et al., 2016</b>       | 320 | 0.32 | L | Dec | Nonword Rate       | CR | DIBELS |
| <b>Petersen et al., 2016</b>       | 320 | 0.44 | L | Dec | Real Word Rate     | NR | TOWRE  |
| <b>Petersen et al., 2016</b>       | 320 | 0.41 | L | Dec | Nonword Rate       | NR | TOWRE  |
| <b>Petersen et al., 2016</b>       | 320 | 0.53 | L | Dec | Nonword Rate       | CR | DIBELS |
| <b>Petersen et al., 2016</b>       | 320 | 0.54 | L | Dec | Real Word Rate     | NR | TOWRE  |
| <b>Petersen et al., 2016</b>       | 320 | 0.32 | L | Dec | Nonword Rate       | NR | TOWRE  |
| <b>Petersen et al., 2016</b>       | 320 | 0.2  | L | Dec | Nonword Rate       | CR | DIBELS |
| <b>Petersen et al., 2016</b>       | 320 | 0.37 | L | Dec | Real Word Rate     | NR | TOWRE  |
| <b>Petersen et al., 2016</b>       | 320 | 0.49 | L | Dec | Nonword Rate       | NR | TOWRE  |
| <b>Petersen et al., 2016</b>       | 320 | 0.5  | L | Dec | Nonword Rate       | CR | DIBELS |
| <b>Petersen et al., 2016</b>       | 280 | 0.35 | L | Dec | Real Word Rate     | NR | TOWRE  |
| <b>Petersen et al., 2016</b>       | 280 | 0.32 | L | Dec | Nonword Rate       | NR | TOWRE  |
| <b>Petersen et al., 2016</b>       | 280 | 0.5  | L | Dec | Nonword Rate       | CR | DIBELS |
| <b>Petersen et al., 2016</b>       | 280 | 0.52 | L | Dec | Real Word Rate     | NR | TOWRE  |
| <b>Petersen et al., 2016</b>       | 280 | 0.56 | L | Dec | Nonword Rate       | NR | TOWRE  |
| <b>Petersen et al., 2016</b>       | 280 | 0.32 | L | Dec | Nonword Rate       | CR | DIBELS |
| <b>Petersen et al., 2016</b>       | 280 | 0.21 | L | Dec | Real Word Rate     | NR | TOWRE  |
| <b>Petersen et al., 2016</b>       | 280 | 0.39 | L | Dec | Nonword Rate       | NR | TOWRE  |
| <b>Petersen et al., 2016</b>       | 280 | 0.52 | L | Dec | Nonword Rate       | CR | DIBELS |
| <b>Petersen et al., 2016</b>       | 280 | 0.54 | L | Dec | Real Word Rate     | NR | TOWRE  |
| <b>Petersen et al., 2016</b>       | 280 | 0.34 | L | Dec | Nonword Rate       | NR | TOWRE  |
| <b>Petersen et al., 2016</b>       | 280 | 0.27 | L | Dec | Nonword Rate       | CR | DIBELS |
| <b>Petersen et al., 2016</b>       | 280 | 0.48 | L | Dec | Real Word Rate     | NR | TOWRE  |
| <b>Petersen et al., 2016</b>       | 280 | 0.55 | L | Dec | Nonword Rate       | NR | TOWRE  |
| <b>Petersen et al., 2016</b>       | 280 | 0.57 | L | Dec | Nonword Rate       | CR | DIBELS |
| <b>Petersen et al., 2018</b>       | 370 | 0.46 | L | Dec | Real Word Rate     | CR | DIBELS |
| <b>Petersen et al., 2018</b>       | 370 | 0.45 | L | Dec | Real Word Rate     | CR | DIBELS |
| <b>Petersen et al., 2018</b>       | 370 | 0.44 | L | Dec | Real Word Rate     | CR | DIBELS |
| <b>Petersen et al., 2018</b>       | 370 | 0.42 | L | Dec | Real Word Rate     | CR | DIBELS |
| <b>Petersen et al., 2018</b>       | 370 | 0.48 | L | Dec | Real Word Rate     | CR | DIBELS |
| <b>Petersen et al., 2018</b>       | 370 | 0.46 | L | Dec | Real Word Rate     | CR | DIBELS |
| <b>Petersen et al., 2018</b>       | 370 | 0.45 | L | Dec | Real Word Rate     | CR | DIBELS |

|                                       |     |       |   |     |                    |           |                                 |
|---------------------------------------|-----|-------|---|-----|--------------------|-----------|---------------------------------|
| <b>Petersen et al., 2018</b>          | 370 | 0.42  | L | Dec | Real Word Rate     | CR        | DIBELS                          |
| <b>Petersen et al., 2018</b>          | 370 | 0.41  | L | Dec | Real Word Rate     | CR        | DIBELS                          |
| <b>Petersen et al., 2018</b>          | 370 | 0.4   | L | Dec | Real Word Rate     | CR        | DIBELS                          |
| <b>Petersen et al., 2018</b>          | 370 | 0.38  | L | Dec | Real Word Rate     | CR        | DIBELS                          |
| <b>Petersen et al., 2018</b>          | 370 | 0.38  | L | Dec | Real Word Rate     | CR        | DIBELS                          |
| <b>Petersen et al., 2018</b>          | 370 | 0.5   | L | Dec | Real Word Rate     | CR        | DIBELS                          |
| <b>Petersen et al., 2018</b>          | 370 | 0.49  | L | Dec | Real Word Rate     | CR        | DIBELS                          |
| <b>Petersen et al., 2018</b>          | 370 | 0.48  | L | Dec | Real Word Rate     | CR        | DIBELS                          |
| <b>Petersen et al., 2018</b>          | 370 | 0.44  | L | Dec | Real Word Rate     | CR        | DIBELS                          |
| <b>Sittner Bridges, 2009, Study 1</b> | 90  | 0.516 | L | PA  | Real Word Accuracy | NR        | WRMT-R                          |
| <b>Sittner Bridges, 2009, Study 1</b> | 90  | 0.477 | L | PA  | Nonword Accuracy   | NR        | WRMT-R/NU                       |
| <b>Sittner Bridges, 2009, Study 2</b> | 96  | 0.426 | L | PA  | Real Word Accuracy | NR        | WRMT-R                          |
| <b>Sittner Bridges, 2009, Study 2</b> | 96  | 0.485 | L | PA  | Nonword Accuracy   | NR        | WRMT-R/NU                       |
| <b>Spector, 1992</b>                  | 38  | 0.6   | L | PA  | Real Word Accuracy | Inventory | San Diego Quick Assessment List |
| <b>Wyman-Chin, 2018</b>               | 9   | 0.44  | C | PA  | Real Word Accuracy | NR        | WMSLR                           |
| <b>Wyman-Chin, 2018</b>               | 9   | 0.87  | C | PA  | Real Word Accuracy | NR        | WMSLR                           |
| <b>Yap, 2018</b>                      | 99  | 0.56  | L | PA  | Real Word Accuracy | NR        | WJ-III                          |
| <b>Yap, 2018</b>                      | 99  | 0.6   | L | PA  | Nonword Accuracy   | NR        | WJ-III                          |
| <b>Zumeta, 2010</b>                   | 37  | 0.59  | C | PA  | Real Word Rate     | RD        | Dolch word list                 |

*Note.* *N* = number of participants; *r* = Pearson's correlation coefficient; C = cross-sectional study design; L = longitudinal study design; PA = phonological awareness; Dec = decoding; SSK = sound-symbol knowledge; NR = norm-referenced; CR = criterion-referenced; RD = researcher-developed; 3DM = Differential Diagnostics for Dyslexia; BAS-2 = British Ability Scales-2; DIBELS = Dynamic Indicators of Basic Early Literacy Skills; EMT = Ein Minuten Test; HKT-SpLd = Hong Kong Test of Specific Learning Difficulties in Reading and Writing; K-ABC = Kaufman-Assessment Battery for Children; SLRT-II = Salzburger Lese und Rechtschreibtest; SWRT = Single Word Reading Test; TALE = Test de Análisis de la Lecto-escritura; TOWRE = Test of Word Reading Efficiency; WJ-III = Woodcock Johnson-III; WMSLR = Woodcock Muñoz Language Survey Revised; WRAT = Wide Range Achievement Test; WRMT-R/NU = Woodcock Reading Mastery Tests-Revised/Normative Update.

## References

- Aravena, S., Snellings, P., Tijms, J., & van der Molen, M. W. (2013). A lab-controlled simulation of a letter-speech sound binding deficit in dyslexia. *Journal of Experimental Child Psychology*, 115(4), 691–707. <https://doi.org/10.1016/j.jecp.2013.03.009>
- Aravena, S., Tijms, J., Snellings, P., & van der Molen, M. W. (2018). Predicting individual differences in reading and spelling skill with artificial script-based letter-speech sound training. *Journal of Learning Disabilities*, 51(6), 552–564. <https://doi.org/10.1177/0022219417715407>
- Barker, R. M., & Saunders, K. J. (2020). Validity of a nonspeech dynamic assessment of the alphabetic principle in preschool and school-aged children. *Augmentative and Alternative Communication*, 36(1), 54–62. <https://doi.org/10.1080/07434618.2020.1737965>
- Caffrey, E. (2006). *A comparison of dynamic assessment and progress monitoring in the prediction of reading achievement for students in kindergarten and first grade* [Doctoral dissertation]. Vanderbilt University.
- Cho, E., & Compton, D. L. (2015). Construct and incremental validity of dynamic assessment of decoding within and across domains. *Learning and Individual Differences*, 37, 183–196. <https://doi.org/10.1016/j.lindif.2014.10.004>
- Cho, E., Compton, D. L., Fuchs, D., Fuchs, L. S., & Bouton, B. (2014). Examining the predictive validity of a dynamic assessment of decoding to forecast response to tier 2 intervention. *Journal of Learning Disabilities*, 47(5), 409–423. <https://doi.org/10.1177/0022219412466703>
- Cho, E., Compton, D. L., Gilbert, J. K., Steacy, L. M., Collins, A. A., & Lindström, E. R. (2017). Development of first-graders' word reading skills: For whom can dynamic assessment tell us more? *Journal of Learning Disabilities*, 50(1), 95–112. <https://doi.org/10.1177/0022219415599343>
- Chow, B. W. Y. (2014). The differential roles of paired associate learning in Chinese and English word reading abilities in bilingual children. *Reading and Writing*, 27(9), 1657–1672. <https://doi.org/10.1007/s11145-014-9514-3>
- Clayton, F. J., Sears, C., Davis, A., & Hulme, C. (2018). Verbal task demands are key in explaining the relationship between paired-associate learning and reading ability. *Journal of Experimental Child Psychology*, 171, 46–54. <https://doi.org/10.1016/j.jecp.2018.01.004>
- Compton, D. L., Fuchs, D., Fuchs, L. S., Bouton, B., Gilbert, J. K., Barquero, L. A., Cho, E., & Crouch, R. C. (2010). Selecting at-risk first-grade readers for early intervention: Eliminating false positives and exploring the promise of a two-stage gated screening process. *Journal of Educational Psychology*, 102(2), 327–340. <https://doi.org/10.1037/a0018448>
- Coventry, W. L., Byrne, B., Olson, R. K., Corley, R., & Samuelsson, S. (2011). Dynamic and static assessment of phonological awareness in preschool: A behavior-genetic study. *Journal of Learning Disabilities*, 44(4), 322–329. <https://doi.org/10.1177/0022219411407862>

- Cunningham, A., & Carroll, J. (2011). Age and schooling effects on early literacy and phoneme awareness. *Journal of Experimental Child Psychology*, 109(2), 248–255. <https://doi.org/10.1016/j.jecp.2010.12.005>
- Edwards, A. (2020). *Predictor importance in future and concurrent predictions of oral reading fluency* [Course report, Florida State University].
- Fuchs, D., Compton, D. L., Fuchs, L. S., Bouton, B., & Caffrey, E. (2011). The construct and predictive validity of a dynamic assessment of young children learning to read: Implications for RTI frameworks. *Journal of Learning Disabilities*, 44(4), 339–347. <https://doi.org/10.1177/0022219411407864>
- Gan, Y., Zhang, J., Kahrabi-Yamato, L., Su, Y., Zhang, J., Jiang, Y., Hui, Y., & Li, H. (2022). The unique predictive value of dynamic assessment of character decoding in reading development of Chinese children from Grades 1 to 2. *Scientific Studies of Reading*, 27(3), 215–231. <https://doi.org/10.1080/10888438.2022.2143271>
- Gellert, A. S., & Elbro, C. (2017a). Does a dynamic test of phonological awareness predict early reading difficulties? A longitudinal study from kindergarten through Grade 1. *Journal of Learning Disabilities*, 50(3), 227–237. <https://doi.org/10.1177/0022219415609185>
- Gellert, A. S., & Elbro, C. (2017b). Try a little bit of teaching: A dynamic assessment of word decoding as a kindergarten predictor of word reading difficulties at the end of Grade 1. *Scientific Studies of Reading*, 21(4), 277–291. <https://doi.org/10.1080/10888438.2017.1287187>
- Gellert, A. S., & Elbro, C. (2018). Predicting reading disabilities using dynamic assessment of decoding before and after the onset of reading instruction: A longitudinal study from kindergarten through Grade 2. *Annals of Dyslexia*, 68(2), 126–144. <https://doi.org/10.1007/s11881-018-0159-9>
- Gillam, S. L., Fargo, J., Foley, B., & Olszewski, A. (2011). A nonverbal phoneme deletion task administered in a dynamic assessment format. *Journal of Communication Disorders*, 44(2), 236–245. <https://doi.org/10.1016/j.jcomdis.2010.11.003>
- Horbach, J., Scharke, W., Cröll, J., Heim, S., & Günther, T. (2015). Kindergarteners' performance in a sound–symbol paradigm predicts early reading. *Journal of Experimental Child Psychology*, 139, 256–264. <https://doi.org/10.1016/j.jecp.2015.06.007>
- Horbach, J., Weber, K., Opolony, F., Scharke, W., Radach, R., Heim, S., & Günther, T. (2018). Performance in sound–symbol learning predicts reading performance 3 years later. *Frontiers in Psychology*, 9, Article 1716. <https://doi.org/10.3389/fpsyg.2018.01716>
- Law, J. M., De Vos, A., Vanderauwera, J., Wouters, J., Ghesquière, P., & Vandermosten, M. (2018). Grapheme–phoneme learning in an unknown orthography: A study in typical reading and dyslexic children. *Frontiers in Psychology*, 9, Article 1393. <https://doi.org/10.3389/fpsyg.2018.01393>
- Liu, C., Chung, K. K. H., Wang, L. C., & Liu, D. (2021). The relationship between paired associate learning and Chinese word reading in kindergarten children. *Journal of Research in Reading*, 44(2), 264–283. <https://doi.org/10.1111/1467-9817.12333>
- Loreti, B. (2015). *Validity of a Spanish nonspeech dynamic assessment of phonological awareness in children from Spanish-speaking backgrounds* [Master's dissertation]. University of South Florida. <https://digitalcommons.usf.edu/etd/5732>
- Osa Fuentes, P. M. D. L. (2003). *Evaluación dinámica del procesamiento fonológico en el inicio lector* [Dynamic evaluation of phonological processing in beginning readers] [Doctoral dissertation]. Universidad de Granada. <https://hdl.handle.net/10481/4425>
- Petersen, D. B., Allen, M. M., & Spencer, T. D. (2016). Predicting reading difficulty in first grade using dynamic assessment of decoding in early kindergarten: A large-scale longitudinal study. *Journal of Learning Disabilities*, 49(2), 200–215. <https://doi.org/10.1177/0022219414538518>
- Petersen, D. B., & Gillam, R. B. (2015). Predicting reading ability for bilingual Latino children using dynamic assessment. *Journal of Learning Disabilities*, 48(1), 3–21. <https://doi.org/10.1177/0022219413486930>
- Petersen, D. B., Gragg, S. L., & Spencer, T. D. (2018). Predicting reading problems 6 years into the future: Dynamic assessment reduces bias and increases classification accuracy. *Language, Speech, and Hearing Services in Schools*, 49(4), 875–888. [https://doi.org/10.1044/2018\\_LSHSS-DYSLC-18-0021](https://doi.org/10.1044/2018_LSHSS-DYSLC-18-0021)
- Sittner Bridges, M. (2009). *The use of a dynamic screening of phonological awareness to predict reading risk for kindergarten students* [Doctoral dissertation]. University of Kansas. <https://kuscholarworks.ku.edu/handle/1808/6631?show=full>
- Spector, J. E. (1992). Predicting progress in beginning reading: Dynamic assessment of phonemic awareness. *Journal of Educational Psychology*, 84(3), 353–363. <https://doi.org/10.1037/0022-0663.84.3.353>
- Wyman Chin, K. R. (2018). *Validity of a dynamic assessment of phonological awareness in emergent bilingual children* [Master's dissertation]. University of South Florida. <https://digitalcommons.usf.edu/etd/7384>
- Yap, D. F. F. (2018). *The utility of dynamic assessment of phonological awareness for bilingual children in Singapore* [Doctoral dissertation]. San Francisco State University & University of California, Berkeley. <https://escholarship.org/uc/item/1kg9j39s>
- Zumeta, R. O. R. (2010). *Enhancing the accuracy of kindergarten screening* [Doctoral dissertation]. Vanderbilt University. <https://etd.library.vanderbilt.edu/etd-08192010-224436>
